# Supplementary material for: A decellularized extracellular matrix derived from keratinocytes can suppress cellular senescence induced by replicative and oxidative stresses
Source: Royal Society of Chemistry journal article supplement (doi:10.1039/d2bm00897a), 2022-01-01
Supplement: d2bm00897a1.pdf [file d2bm00897a1.pdf]

## Supporting Information

### Decellularized extracellular matrix derived from keratinocytes can suppress cellular senescence induced by replicative and oxidative stresses.

Takashi Hoshiba\*

#### Supplemental Figures

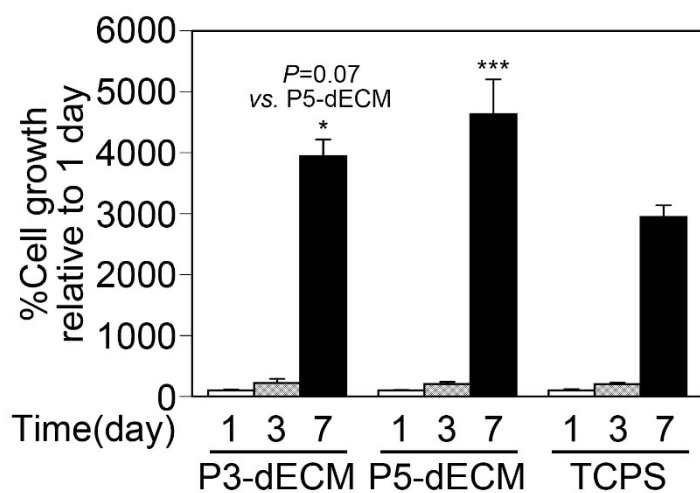

Figure S1. The growth percentage of P3-NHEKs on NHEK-derived dECM and TCPS. Data represent means  $\pm$  SD (n=4). \*:  $P < 0.05$ , \*\*\*:  $P < 0.005$  vs. TCPS (7 days).

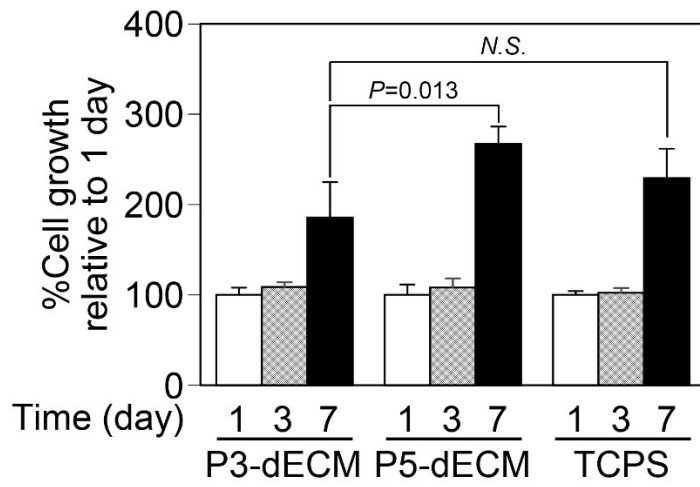

Figure S2. The growth percentage of P5-NHEKs on NHEK-derived dECM and TCPS. Data represent means  $\pm$  SD (n=4). *N.S.* indicates not significant difference.

## Supplemental Tables

Table S1. Primer sequences for RT-PCR.

| Gene          | Sequence (5' to 3')                                            | Reference |
|---------------|----------------------------------------------------------------|-----------|
| <i>LAMA3</i>  | F: CACTGTGAACGCTGCCAGGAGGGCTA<br>R: CAGCTACCTCCGAATTTCTGGGGATT | [1]       |
| <i>LAMA5</i>  | F: GGTCACCCGCCGGTATTATT<br>R: AGTCGATACAGACACCCCA              | -         |
| <i>COL4A1</i> | F: GGATCGGCTACTCTTTTGTGATG<br>R: AAGCGTTTGCGTAGTAATTGCA        | [2]       |
| <i>HSPG2</i>  | F: GGCATACGATGGCTTGTCTC<br>R: CACCTCTCGGAACTCTCTGG             | -         |
| <i>NID-1</i>  | F: TCCGCTTCTACGACAGATCC<br>R: GAAAGAGATCTCCGGGAACC             | -         |
| <i>GAPDH</i>  | F: GGGCTGCTTTTAACTCTGGT<br>R: TGGCAGTTTTTCTAGACGG              | [3]       |

*LAMA5*, *HSPG2*, and *NID-1* were originally designed.

Table S2. Primer and probe sequences for real-time PCR.

| Gene         | Sequence (5' to 3') or Gene Expression Assay No.                                                  | Reference |
|--------------|---------------------------------------------------------------------------------------------------|-----------|
| <i>SOD1</i>  | Hs00533490_m1                                                                                     | -         |
| <i>GPXI</i>  | Hs00829989_gH                                                                                     | -         |
| <i>CAT</i>   | Hs00156308_m1                                                                                     | -         |
| <i>AQP3</i>  | Hs00185020_m1                                                                                     | -         |
| <i>GAPDH</i> | F: ATGGGGAAGGTGAAGGTCG<br>R: TAAAAGCAGCCTGGTGACC<br>Probe: [FAM]CGCCCAATACGACCAAATCCGTTGAC[TAMRA] | [4]       |

Table S3. Projected cell areas of P3-NHEKs under oxidative condition.

| Substrates | Projected cell area ( $\mu\text{m}^2$ ) | P-value vs. TCPS     |
|------------|-----------------------------------------|----------------------|
| P3-dECM    | 553±641                                 | $7.5 \times 10^{-9}$ |
| P5-dECM    | 839±937                                 | $1.1 \times 10^{-6}$ |
| TCPS       | 632±589                                 | -                    |

Statistical differences were determined by Kruskal-Wallis test and Wilcoxon rank sum test was applied as a *post hoc* test. Over 550 cells/sample were measured.

Table S4. Projected cell areas of P5-NHEKs under normal condition.

| Substrates | Projected cell area ( $\mu\text{m}^2$ ) | P-value vs. TCPS |
|------------|-----------------------------------------|------------------|
| P3-dECM    | 2470 $\pm$ 1185                         | 0.0065           |
| P5-dECM    | 2713 $\pm$ 1375                         | N.S.             |
| TCPS       | 2724 $\pm$ 1267                         | -                |

Statistical differences were determined by Kruskal-Wallis test and Wilcoxon rank sum test was applied as a *post hoc* test. Over 350 cells/sample were measured.

Table S5. The yields of passaged cells on P3-dECM and TCPS (unit:  $\times 10^4$  cells).

|    | Passage                | P3-dECM | TCPS | Initial cell number |
|----|------------------------|---------|------|---------------------|
| #1 | Passage 2 to passage 3 | 451     | 625  | 50.25               |
| #2 | Passage 3 to passage 4 | 326     | 371  | 75                  |
| #3 | Passage 3 to passage 4 | 369     | 435  | 75                  |

## References

- [1] H. Fujiwara, Y. Kikkawa, N. Sanzen, K. Sekiguchi, *J. Biol. Chem.* **2001**, 276, 17550.
- [2] T.-W. Wang, J.-S. Sun, Y.-C. Huang, H.-C. Wu, L.-T. Chen, F.-H. Lin, *Biomaterials* **2006**, 27, 5059.
- [3] R. Tuli, S. Tuli, S. Nandi, X. Huang, P.A. Manner, W.J. Hozack, K.G. Danielson, D.J. Hall, R.S. Tuan, *J. Biol. Chem.* **2003**, 278, 41227.
- [4] I. Martin, M. Jakob, D. Schafer, G. Spagnoli, M. Heberer, *Osteoarthr. Cartil.* **2001**, 9, 112.
